# Supplementary material for: Modular Clinical Decision Support Networks (MoDN)—Updatable, interpretable, and portable predictions for evolving clinical environments
Source: PubMed Central journal article supplement (PMC10351690; doi:10.1371/journal.pdig.0000108), 2023-07-17
Supplement: pdig.0000108.s001.pdf [file pdig.0000108.s001.pdf]

|                | number of available values | minimum value | maximum value | description                                          |
|----------------|----------------------------|---------------|---------------|------------------------------------------------------|
| agem           | 3192                       | 2.069815      | 59.794659     | Age in months                                        |
| ex             | 3192                       | 0.000000      | 1.000000      | Sex                                                  |
| hiv_mom        | 3185                       | 0.000000      | 9.000000      | Mother's HIV status                                  |
| ttt_before     | 1725                       | 0.000000      | 16.000000     | Treatment received before D0 visit                   |
| vac_pcv1       | 1569                       | 0.000000      | 9.000000      | History: 1st pneumococcal vaccine                    |
| vac_pcv3       | 1159                       | 0.000000      | 9.000000      | History: 3rd pneumococcal vaccine                    |
| bcx_id         | 622                        | 1.000000      | 25.000000     | Blood cx ID, D0                                      |
| pglucose       | 305                        | 3.100000      | 14.100000     | blood sugar (mmol/L), D0                             |
| udip_ket       | 687                        | 0.000000      | 4.000000      | Urine ketones                                        |
| udip_nit       | 686                        | 0.000000      | 2.000000      | Urine nitrites, D0                                   |
| udip_spec      | 673                        | 1.000000      | 6.000000      | Urine Spec Grav, D0                                  |
| urine_cx_id    | 74                         | 1.000000      | 15.000000     | Urine culture: Microbe identified                    |
| urine_type     | 553                        | 1.000000      | 3.000000      | Urine: type of collection, D0, F23                   |
| convulscomplex | 3191                       | 0.000000      | 1.000000      | Sign: Complex convulsion $t_i=2/24h$ (d0)            |
| pallor         | 3192                       | 0.000000      | 1.000000      | Sign: Any sign of anemia (d0)                        |
| respdistress   | 3192                       | 0.000000      | 1.000000      | Sign: respiratory distress (d0)                      |
| skin_sev       | 3192                       | 0.000000      | 1.000000      | Sign: Severe skin or soft tissue infection (d0)      |
| hr1            | 3142                       | 93.000000     | 214.000000    | Heart rate, initial, D0                              |
| hypox          | 1596                       | 0.000000      | 1.000000      | Vital Sign: Hypoxemia, D0                            |
| muac_low       | 2811                       | 0.000000      | 1.000000      | Vital Sign: MUAC $\geq 11.5cm$ & age $\geq 6$ months |
| rr1            | 3180                       | 20.000000     | 90.000000     | Initial RR entered, D0                               |
| temp           | 3186                       | 37.500000     | 42.000000     | Axillary temperature, D0                             |
| waz            | 3188                       | -6.950000     | 5.310000      | Weight-for-age z-score                               |
| complaint      | 3192                       | 0.000000      | 8.000000      | NaN                                                  |
| eye            | 3191                       | 0.000000      | 1.000000      | Symptom: Any eye problem (d0)                        |
| abdopain       | 3191                       | 0.000000      | 1.000000      | Chief Complaint Abdominal Pain, D0                   |
| dyspnea        | 3191                       | 0.000000      | 1.000000      | Chief Complaint Difficulty Breathing, D0             |
| dysuria        | 3191                       | 0.000000      | 1.000000      | Chief Complaint Dysuria, D0                          |
| fev            | 3192                       | 0.000000      | 1.000000      | Chief Complaint Fever, D0                            |
| feveronly      | 3192                       | 0.000000      | 1.000000      | Chief Complaint Fever Only, D0                       |
| loa            | 3191                       | 0.000000      | 1.000000      | Chief Complaint Loss of Appetite, D0                 |
| pharyngitis    | 3191                       | 0.000000      | 1.000000      | Chief Complaint Mouth/Throat problem, D0             |
| uri            | 3192                       | 0.000000      | 1.000000      | Chief Complaint URI, D0                              |

S1 Table: Summary statistics of the features of the e-POCT data set.
